# Supplementary material
Source: PubMed Central journal article supplement (PMC3383600)
Supplement: NIHMS318882-supplement-1.pdf [file NIHMS318882-supplement-1.pdf]

1 **Supplemental Material**

2  
3 **Fibroblast growth factor homologous factor 13 regulates Na<sup>+</sup> channels and conduction**  
4 **velocity in murine heart**

5  
6 **Short title: Wang et al., FGF13 regulates Na<sub>v</sub>1.5 in murine heart**

7  
8 Chuan Wang, PhD; Jessica A. Hennessey, BA; Robert D. Kirkton, BS; Chaojian Wang, PhD;  
9 Victoria Graham, PhD; Ram S. Puranam, PhD; Paul B. Rosenberg, MD; Nenad Bursac, PhD;  
10 and Geoffrey S. Pitt, MD, PhD

11  
12 From the Departments of Medicine/Cardiology (C.W., J.A.H., C.W., V.G., P.B.R., G.S.P.),  
13 Biomedical Engineering (R.D.K., N.B.), Neurobiology (R.S.P., G.S.P.), Medicine (R.S.P.), and  
14 Pharmacology and Molecular Cancer Biology (G.S.P.), Duke University Medical Center,  
15 Durham, North Carolina, USA

16  
17 Address correspondence to: Geoffrey S. Pitt, Box 103030 Med Center, Duke University,  
18 Durham, North Carolina 27710, USA. Phone: 919.668.7641; Fax 919.613.5145; E-mail:  
19 [geoffrey.pitt@duke.edu](mailto:geoffrey.pitt@duke.edu).

20  
21

**1 Materials and Methods**

2 *Mice and rats.* Animals were handled according to National Institutes of Health Guide for the  
3 Care and Use of Laboratory Animals and approved by Duke University Animal Care and  
4 Welfare Committee.  
5

6 *Plasmids and virus:* 6xHis (His6) tagged human FGF13 isoforms, His6-FGF12B, and untagged  
7 FGF14B were subcloned into pIRES2-AcGFP1 (Clontech). The AdEasy System (ATCC) was  
8 used to generate recombinant adenoviruses expressing either FGF13 shRNA (FGF13 shRNA)  
9 or scrambled shRNA (scrambled). The sequence for FGF13 shRNA was:  
10 5'-GCACTTACTCTGTT-TAATTCAAGAGATTAACAGAGTGTAAGTGC-3', which targets  
11 the end of exon 2 and the beginning of exon 3 (nucleotides 320-338; amino acids 107-113 using  
12 the numbering for FGF13-VY). The sequence for FGF13 scrambled shRNA was:  
13 5'-GACCCCTTAGTTTATACCTATTCAAGAGATAGGTATAAACTAAGGGTC-3', which does not  
14 correspond to any known sequence in the mouse genome. Briefly, single-stranded  
15 complementary DNA sequences with an H1 promoter were synthesized (Integrated DNA  
16 Technologies) with Sal I and Xho I sites and annealed under standard conditions. The product  
17 was subcloned into pAdTrack, which also expresses GFP under a CMV promoter. The resultant  
18 plasmid was packaged into a recombinant adenovirus, as described.<sup>1</sup> The recombinant virus  
19 was isolated by multiple freeze/thaw cycles, further amplified in HEK293 cells, and then purified  
20 and concentrated using Vivapure Adenopack 20 (Sartorius Stedim Biotech). The viral titer  
21 (optical particle units/ml) was determined at OD<sub>260</sub>. All constructs were checked by direct  
22 sequencing.  
23

24 *Antibodies:* Monoclonal anti-His6 antibody was from Qiagen; monoclonal anti-pan sodium  
25 channel antibody and anti- $\beta$ -actin antibody were from Sigma; polyclonal anti-Na<sub>v</sub>1.5 antibody  
26 was from Alomone; monoclonal anti-transferrin receptor antibody was from Invitrogen;  
27 monoclonal anti-GAPDH antibody was from Abcam; monoclonal ankyrin-G antibody was a  
28 generous gift from Vann Bennett (Duke University). Polyclonal FGF12 antibody (C-term) was  
29 from Abgent; monoclonal FGF11 and FGF14 antibodies were from NeuroMab. The anti-FGF13  
30 antibody (raised in rabbit) was designed against a peptide (RSVSGVLNKGKSMHNEST) in the  
31 C terminus of the protein and was affinity-purified (Yenzym). Rabbit IgG and goat-anti-rabbit  
32 IgG-HRP were from Santa Cruz. Goat-anti-mouse IgG-HRP was from Millipore. Cy3-conjugated  
33 goat-anti-rabbit IgG (H+L) was from Jackson Labs and Alexa Fluor488 goat-anti-mouse IgG  
34 (H+L) was from Invitrogen.  
35

36 *Isolation, Culture and Adenoviral Infection of Adult Mouse Ventricular Cardiomyocytes:* C57/BL6  
37 mice, 8 to 12 weeks old were anesthetized with tribromoethanol. The hearts were removed and  
38 perfused retrogradely on a Langendorff apparatus for approximately 10 minutes with perfusion  
39 solution containing Minimal Essential Medium (MEM), Joklik modified (Sigma, M8028) with the  
40 following additions (all Sigma, in mmol/L): KHCO<sub>3</sub> 10, HEPES 10, taurine 30, L-carnitine 2,  
41 creatine 2, D-glucose 20 and collagenase type 2 (150 units/ml, Worthington). The heart was  
42 removed from perfusion when soft and white. Left and right ventricle were minced into small  
43 pieces, and then allowed to digest for another 10 minutes in enzyme solution with frequent  
44 trituration at 37 °C. The solution was filtered through sterile 210  $\mu$ m nylon and centrifuged at  
45 1000 rpm for 3 minutes to pellet cells. The cells were resuspended in perfusion solution with  
46 bovine serum albumin (BSA, Sigma) at 5 mg/ml. Calcium tolerance was performed by gradually  
47 adding CaCl<sub>2</sub> to a final concentration of 1 mM. Cells were plated at high density on laminin  
48 (Sigma) coated coverslips in plating medium of MEM with Earle's salts and L-glutamine  
49 (Mediatech) plus 5% heat-inactivated FBS (Gibco), 1% penicillin/streptomycin, and 10 mM 2,3-

1 butanedione monoxime (BDM). Cells were allowed to adhere for 1 hour before switching to  
2 culture medium of MEM with Earle's salts and L-glutamine plus (all from Sigma unless  
3 otherwise specified) 1% penicillin–streptomycin, 0.1 mg/ml BSA, 10 mM BDM, 10 µg/ml insulin,  
4 5.5 µg/ml transferrin, 6.7 ng/ml selenium (insulin-transferrin-selenium 100x solution, Gibco), 5  
5 mM creatine, 5 mM taurine, 2 mM L-carnitine, 25 µM Blebbistatin (Toronto Research  
6 Chemicals). For adenoviral infection, virus was resuspended in culture medium and added to  
7 cells when they were switched from plating medium. Cells were checked for GFP fluorescence  
8 36-48 hours post infection. Rod-shaped, striated cells were used for electrophysiological  
9 recording and image collection.

10  
11 *Immunostaining and confocal microscopy*: For immunocytochemistry, tsA201 cells (48-72 hours  
12 after transfection), or cardiomyocytes (freshly isolated or 48 hours in culture) were fixed in 4%  
13 paraformaldehyde (PFA) for 15 min in room temperature (RT). Cells were washed 3 times with  
14 PBS and then permeabilized with 0.1% triton X-100 for 10 min at RT. To block non-specific  
15 antibody binding, cells were incubated 10% goat serum in PBS (blocking buffer) for 30-60 min at  
16 RT. Cells were incubated overnight with primary antibody in blocking buffer at 4 °C. After  
17 washing three times with blocking buffer, cells were stained with fluorophore-conjugated  
18 secondary antibodies for 1 hour at RT. As a control for specificity, the primary antibody was co-  
19 incubated with the peptide used for immunization or cells were incubated with secondary  
20 antibody only. Finally, cells on the coverslips were mounted on slides using Vectashield  
21 mounting medium (Vector Laboratories). For immunohistochemistry, adult mouse hearts were  
22 fixed with 4% PFA for 2 hours at room temperature, rinsed in PBS, cryoprotected in 30%  
23 sucrose over night and mounted in OCT. The hearts were then cryosectioned into 14 µm slices.  
24 The slices were stained for immunocytochemistry as above. All images were collected on a  
25 Zeiss 510 inverted confocal microscope (Carl Zeiss, Inc.) with a Zeiss 63x oil (NA, 1.4) or 40x  
26 dry (NA, .95) objective. The pinhole was set to 1.0 (Airy Disc) by using Carl Zeiss Imaging  
27 software (version 4.0 SP1). The emission signals from AlexaFluor488 and Cy3 were collected  
28 using 500 to 520 nm and LP560 nm filters, respectively. All cells were prepared identically, and  
29 imaged by using identical parameters (e.g. gain, offset, magnification, brightness, contrast,  
30 pinhole, scan time, resolution, etc.). Images were imported into Photoshop (Adobe) for  
31 processing.

32  
33 *RNA isolation, cDNA synthesis and quantitative real-time RT-PCR (qPCR)*: Total RNA was  
34 isolated from adult mouse heart. In brief, heart tissue was collected, weighed, homogenized,  
35 and processed for total RNA isolation at 4 °C using RNeasy Plus Mini Kit (Qiagen, Valencia,  
36 CA), following manufacturer's instructions. The concentration of total RNA for each sample was  
37 determined by Nanodrop ND-1000 Spectrophotometer (Thermo Scientific). The integrity of the  
38 extracted RNA was confirmed by electrophoresis under denaturing conditions. Reverse  
39 transcription (RT) was performed using iScript cDNA Synthesis Kit (Bio-Rad) for synthesis of  
40 single-stranded cDNA library according to manufacturer's protocol. qPCR was performed using  
41 the iCycler iQ Real-Time PCR Detection System (Bio-Rad). Each sample was run in triplicates.  
42 Three controls aimed at detecting DNA contamination in the RNA samples or during the RT or  
43 qPCR reactions were always included: an RT mixture without reverse transcriptase, an RT  
44 mixture including the enzyme reverse transcriptase but no RNA, and a water only control  
45 (reaction mixture with water instead of the cDNA template). **Online Table I** lists the primer pairs  
46 used for the amplification of each FGF13 isoform and GAPDH. PCR products were visualized  
47 on a 1.5% agarose gel. The data were collected and analyzed using iCycler Software (Bio-Rad).  
48 GAPDH was used as internal control. Relative quantification was performed using the

1 comparative threshold (CT) method ( $\Delta\Delta CT$ ) after determining the CT values for the reference  
2 (GAPDH) and target genes (FGF11, 12, 13 and 14 isoforms) in each sample set.

3  
4 *Immunoblotting:* Cell lysates were prepared by directly extracting cells in a lysis buffer  
5 containing 150 mM NaCl, 50 mM Tris-HCl, 1% Triton, 0.5% NP40 and a protease inhibitor  
6 cocktail (Roche). Following centrifugation at 10,000 rpm for 10 minutes, supernatants were  
7 collected and protein concentration quantified using a BCA Protein Assay Kit (Thermo). About  
8 20  $\mu$ g of protein were dissolved with 4x LDS sample buffer (Invitrogen) and separated on  
9 NuPAGE 4–12% Bis–Tris gels (Invitrogen). The blots were visualized by enhanced  
10 chemiluminescence and images were captured by using Kodak Image Station 4000 R and  
11 quantified using Kodak MI SE software.

12  
13 *Biotinylation:* 48 hours after transfection, cultured mouse ventricular myocytes were washed  
14 with ice cold PBS and incubated in 1 mg/ml sulfo-NHS-SS-Biotin (Thermo Scientific) in PBS for  
15 30 minutes at 4 °C. Cells were washed twice with 100 mM glycine to quench the reaction, and  
16 then resuspended in lysis buffer to rock for 30 minutes at 4 °C. Lysates were passed through  
17 18G and then 25G needles for 25 passes each, then spun at 16,000 x g for 15 minutes at 4°C.  
18 Supernatants were collected and allowed to rock overnight with NeutrAvidin agarose resin  
19 (Thermo Scientific). The following day, the beads were washed three times with lysis buffer,  
20 resuspended in 4x LDS sample buffer (Invitrogen) containing 50 mM DTT and heated to 95 °C  
21 for 3 minutes. Samples were then subject to SDS page electrophoresis and western blotting as  
22 above.

23  
24 *GST pull down:* The human Na<sub>v</sub>1.5 C-terminus (aa 1773-2018) was fused to GST in pGEX-4T.  
25 The protein was expressed in BL21 cells and induced by isopropyl  $\beta$ -D-1-thiogalactopyranoside  
26 at OD<sub>600</sub>=0.6 at 37 °C for 4 hours. The fusion protein and the GST control protein were purified  
27 with glutathione sepharose 4B (GE Healthcare) according to the manufacturer's  
28 recommendations and retained on the beads. The cell lysate from tsA201 cells overexpressing  
29 His6-tagged FGF13-VY (total protein 200 $\mu$ g) was added and incubated overnight at 4°C in lysis  
30 buffer. The beads were washed extensively, and the bound proteins were eluted with SDS-  
31 PAGE sample buffer. Proteins were separated on a 12 % SDS-PAGE gel under reduced  
32 conditions and transferred to nitrocellulose membranes. The membrane was subsequently  
33 immunoblotted for the His6-tagged FGF13-VY as above.

34  
35 *Co-immunoprecipitation:* Fresh adult mouse heart lysate was prepared by homogenizing tissue  
36 on ice in lysis buffer containing 50 mM NaCl, 20mM HEPES, 1% TritonX100, 0.5% NP40 and  
37 protease inhibitor cocktail (Roche). The crude heart lysate was centrifuged at 3500 rpm for 15  
38 minutes and the supernatant retained. Protein concentration was determined using the BCA  
39 Protein Assay Kit. To pre-clear the lysate, supernatant was exposed to 30  $\mu$ l of Protein A/G  
40 Agarose beads (Santa Cruz Biotechnology) for 30 minutes at 4° C. A total of ~1.5  $\mu$ g of anti-  
41 Na<sub>v</sub>1.5 or anti-FGF13 antibody was added to the pre-cleared lysates and the samples were  
42 rocked gently at 4° C for 1 hour. After adding 30  $\mu$ l protein A/G agarose beads, the samples  
43 were incubated on a rocker for 12 hours at 4° C. The antibody-protein A/G agarose complex  
44 was spun down at 2500 rpm for 5 minutes and washed with lysis buffer three times. After the  
45 final spin, 100ul of lysis buffer and 20  $\mu$ l of 6X sample buffer were added. Protein was eluted  
46 from the beads at 95° C for 5 minutes. 20  $\mu$ l of samples were subjected to SDS-PAGE and co-  
47 immunoprecipitation was verified by immunoblot. As a negative control parallel reactions of pre-  
48 cleared lysate with Rabbit IgG as opposed to the antibody of interest were performed.

49

1 *Optical Mapping of Action Potential Propagation:* Neonatal rat (Sprague Dawley) ventricular  
2 myocytes (NRVMs) were isolated and seeded onto fibronectin-coated coverslips to create  
3 confluent isotropic monolayers<sup>2</sup>. On the second day of culture, the culture media (DMEM/F12  
4 supplemented with 10% calf serum, 10% horse serum, and penicillin; Gibco) was exchanged  
5 with a reduced serum media (containing 2% horse serum) and experimental cultures were  
6 transduced with adenoviral constructs (scrambled or FGF13 shRNA). Four days later, on culture  
7 day 6, action potential propagation was accessed by optical mapping as previously described<sup>3</sup>.  
8 Specifically, monolayers were stained with the voltage-sensitive dye, Di-4 ANEPPS (15  $\mu$ M, 5  
9 minutes at room temperature), placed into a heated recording chamber perfused with Tyrode  
10 solution, and transmembrane voltage was optically mapped with 504 optical fibers arranged into  
11 a 20 mm diameter hexagonal bundle (Redshirt Imaging). Fluorescence signals were converted  
12 to voltage by photodiodes and acquired at a 2.4 kHz sampling rate with a 750  $\mu$ m spatial  
13 resolution. A bipolar point electrode was used to stimulate the cultures at 1.2x threshold to  
14 initiate impulse propagation. Data was processed, displayed, and analyzed using custom-made  
15 MATLAB software. Conduction velocity (CV), action potential duration at 80% repolarization  
16 (APD80), and maximum capture rate (MCR) were derived as previously described.<sup>3</sup>

17 *Cell Culture and Transfections:* tsA201 cells were maintained in Dulbecco's modified Eagle's  
18 medium (Invitrogen) supplemented with 4 mM L-glutamine, 10% fetal bovine serum (Gibco),  
19 100 U ml<sup>-1</sup> penicillin, and 100  $\mu$ g ml<sup>-1</sup> streptomycin and incubated at 37° with 5% CO<sub>2</sub>. tsA201  
20 cells were transfected at 80%-90% confluency using Lipofectamine 2000 (Invitrogen) according  
21 to the manufacturer's instructions. The total amount of DNA for all transfections was kept  
22 constant. All experiments were done 48-72 hours post-transfection.

23  
24 *Electrophysiology:* Na<sup>+</sup> currents ( $I_{Na}$ ) were recorded using the whole-cell patch-clamp technique  
25 as previously described.<sup>4-6</sup> In brief, patch pipettes were fabricated from borosilicate glass  
26 (Warner Instrument Co.) by a P-97 Flaming-Brown micropipette puller (Sutter Instruments) and  
27 fire polished by using a microforge (MF 830, Narishige, Japan). Pipette resistance was between  
28 1.0 and 2.0 M $\Omega$ . Voltage-clamp experiments were performed with an Axopatch 200B amplifier  
29 (Axon Instruments). All recordings were performed at room temperature (20-22 °C) 48-72 hours  
30 after infection of cultured adult cardiomyocytes with adenovirus.  $I_{Na}$  was recorded in bath  
31 solution containing (in mmol/L): NaCl 20, MgCl<sub>2</sub> 1, CaCl<sub>2</sub> 1, HEPES 20, CsCl 55, CsOH 10,  
32 Glucose 10, 4-AP 2, CdCl<sub>2</sub> 0.5, TEA-Cl 50, pH 7.35 (adjusted with HCl). The pipette solution  
33 contained the following (in mmol/L): NaCl 5, CsF 135, EGTA 10, MgATP 5, HEPES 5, TEA-Cl  
34 20, pH 7.35 (adjusted with CsOH). Osmolarity was adjusted to 310 mOsm with sucrose for all  
35 solutions. Recordings were filtered at 5 kHz and digitally sampled at 40 kHz. The pulse protocol  
36 cycle time was 3 seconds to ensure full Na<sup>+</sup> channel recovery. Seal resistances exceeded 8  
37 G $\Omega$ . Whole-cell membrane capacitance was calculated by integrating the capacitive transient  
38 elicited by a 10 mV voltage step from -120 mV to -130 mV. The average time constants for fast  
39 decay of the capacitive current transient were 973.8 $\pm$ 75.9  $\mu$ s (n=14), 1035.8 $\pm$ 143.0  $\mu$ s (n=10)  
40 and 995.0 $\pm$ 94.7 $\mu$ s (n=14) for Control, Scramble and shRNA respectively (p=0.86 for scramble  
41 vs Control and p=0.68 for shRNA vs Control, respectively). Junction potential and pipette  
42 capacitance were corrected, and whole-cell capacitance and series resistance (Table 1) were  
43 ~80% compensated to assure that the command potential was reached within microseconds  
44 with a voltage error < 2 mV. The leakage current was small, and in most experiments, no  
45 leakage correction was necessary. To minimize time-dependent drift in gating parameters, all  
46 protocols were initiated 2-5 minutes after whole-cell configuration was obtained. Current  
47 amplitude data for each cell were normalized to its cell capacitance (current density, pA/pF). To  
48 determine the voltage-dependence of steady-state activation, currents were elicited by a 40 ms  
49 pulse from a holding potential of -120 mV to test potentials between -100 mV and +60 mV in 5

1 mV increments. The sodium conductance ( $G$ ) was calculated by dividing the peak current for  
 2 each voltage step by the driving force ( $V_m - V_{rev}$ ) then normalized to the peak conductance ( $G_{max}$ ).  
 3 Data were fitted with the Boltzmann relationship,  $G/G_{max} = 1 / \{1 + \exp[(V_{1/2} - V_m)/k]\}$  in which  $V_{1/2}$  is  
 4 the voltage at which half of  $Na_v1.5$  channels is activated,  $k$  is the slope factor and  $V_m$  is the  
 5 membrane potential. Standard two-pulse protocols were used to generate the steady-state  
 6 inactivation curves: from the holding potential -120 mV, cells were stepped to 500-ms  
 7 preconditioning potentials varying between -130 mV and -10 mV (prepulse), followed by a 20  
 8 ms test pulse to -30 mV. Currents ( $I$ ) were normalized to  $I_{max}$  and fit to a Boltzmann function of  
 9 the form  $I/I_{max} = 1 / \{1 + \exp[(V_m - V_{1/2})/k]\}$  in which  $V_{1/2}$  is the voltage at which half of  $Na_v1.5$  channels  
 10 is inactivated,  $k$  is the slope factor and  $V_m$  is the membrane potential. Recovery from inactivation  
 11 was analyzed by fitting data with the two exponential function:  $I(t)/I_{max} = A_f \times [1 - \exp(-t/\tau_f)] + A_s \times [1 -$   
 12  $\exp(-t/\tau_s)]$ , where values for  $A$  and  $\tau$  refer to amplitudes and time constants, respectively. Curve  
 13 fitting and data analysis were performed using Clampfit 10.2 software (Axon Instruments) and  
 14 Origin 8 (Originlab Corporation).

15  
 16 **Statistical analyses:** Results are presented as means  $\pm$  standard error; the statistical  
 17 significance of differences between groups was assessed using either a two-tailed Student's  $t$   
 18 test or one-way ANOVA and was set at  $P < 0.05$ .

## 19 20 References

- 21  
22 1. Luo J, Deng Z-L, Luo X, Tang N, Song W-X, Chen J, Sharff KA, Luu HH, Haydon RC,  
23 Kinzler KW, Vogelstein B, He T-C. A protocol for rapid generation of recombinant  
24 adenoviruses using the adeasy system. *Nat. Protocols*. 2007;2:1236-1247
- 25 2. Bursac N, Parker KK, Irvanian S, Tung L. Cardiomyocyte cultures with controlled  
26 macroscopic anisotropy: A model for functional electrophysiological studies of cardiac  
27 muscle. *Circ Res*. 2002;91:e45-54
- 28 3. McSpadden LC, Kirkton RD, Bursac N. Electrotonic loading of anisotropic cardiac  
29 monolayers by unexcitable cells depends on connexin type and expression level. *Am J*  
30 *Physiol Cell Physiol*. 2009;297:C339-351
- 31 4. Nguyen TP, Wang DW, Rhodes TH, George AL, Jr. Divergent biophysical defects  
32 caused by mutant sodium channels in dilated cardiomyopathy with arrhythmia. *Circ Res*.  
33 2008;102:364-371
- 34 5. Benson DW, Wang DW, Dyment M, Knilans TK, Fish FA, Strieper MJ, Rhodes TH,  
35 George AL. Congenital sick sinus syndrome caused by recessive mutations in the  
36 cardiac sodium channel gene (*scn5a*). *The Journal of Clinical Investigation*.  
37 2003;112:1019-1028
- 38 6. Sato PY, Musa H, Coombs W, Guerrero-Serna G, Patino GA, Taffet SM, Isom LL,  
39 Delmar M. Loss of plakophilin-2 expression leads to decreased sodium current and  
40 slower conduction velocity in cultured cardiac myocytes. *Circ Res*. 2009;105:523-526

41

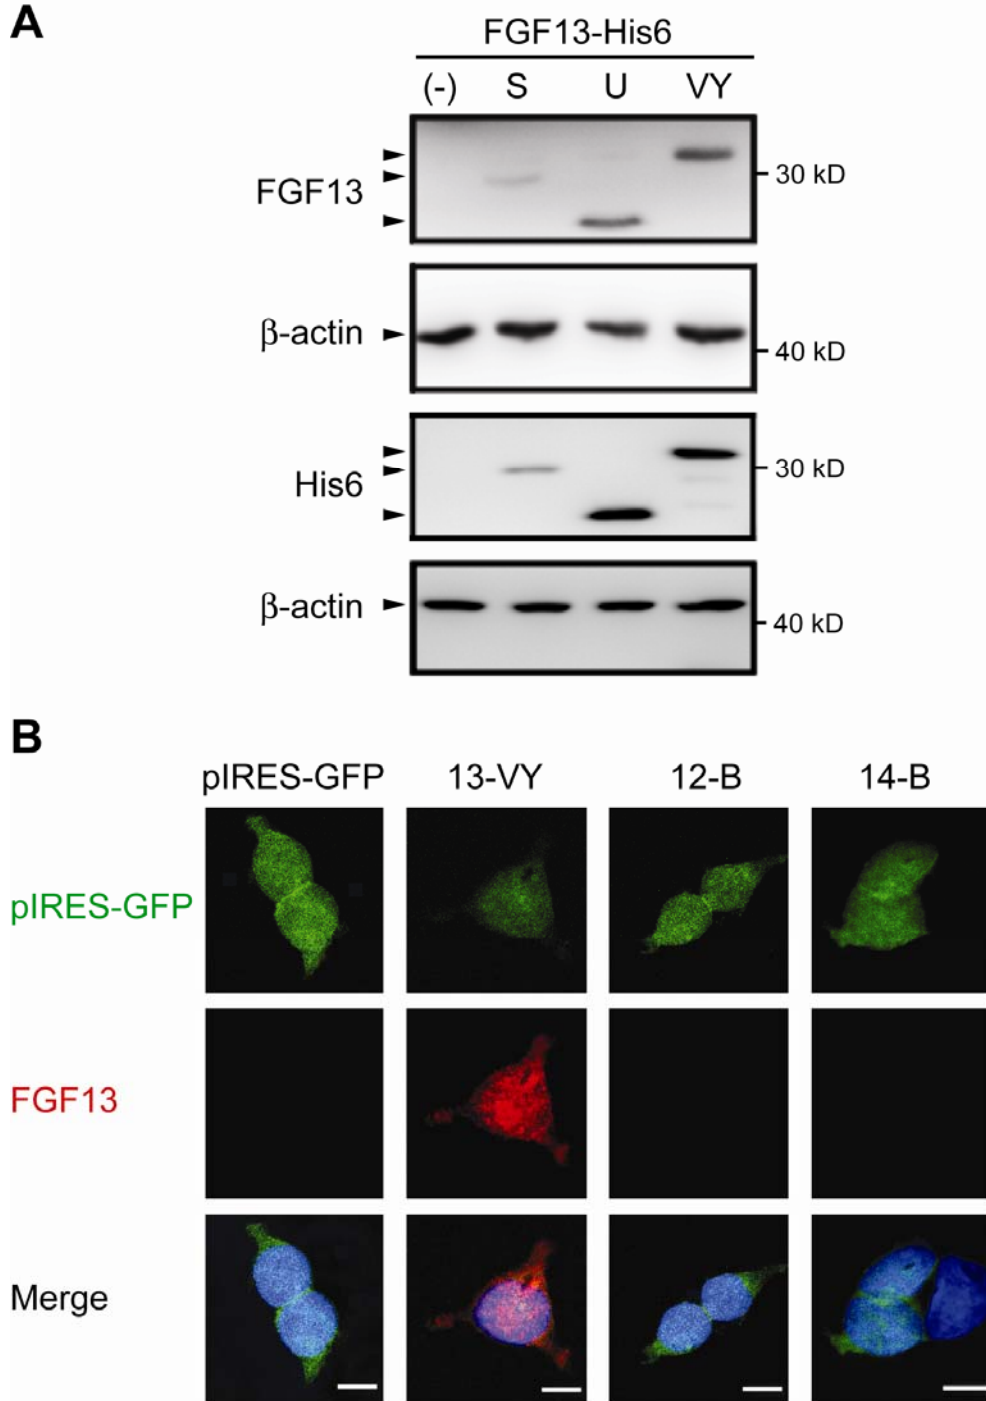

**Online Figure I.** FGF13 antibody specifically recognizes FGF13 isoforms in tsA201 overexpressing cells. (A) Immunoblot with either FGF13 antibody or anti-His6 antibody on lysates from untransfected tsA201 cells or cells expressing the indicated His6-tagged FGF13 isoforms. (B) Immunocytochemistry on tsA201 cells expressing GFP and the indicated FGF13 isoforms. Nuclei were stained with DAPI (blue). Scale bar, 10 μm.

1  
2  
3  
4  
5  
6  
7  
8  
9  
10

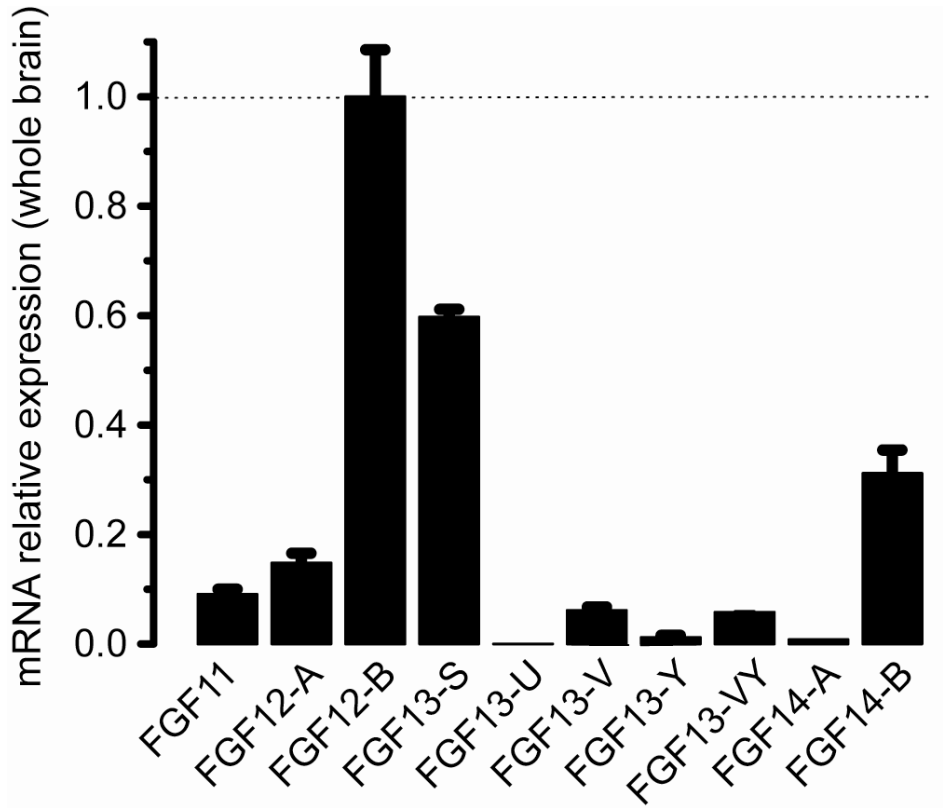

1  
2  
3  
4  
5  
6  
7  
8  
9

**Online Figure II.** Relative mRNA expression of FGF11-14 in adult mouse whole brain using the same primers as for mouse heart (Figure 1). All data were corrected with GAPDH and normalized to FGF12-B. FGF13-Y relative levels were calculated by subtracting FGF13-VY from the sum of both FGF13-VY and FGF13-Y. Results were averaged from three different experiments.



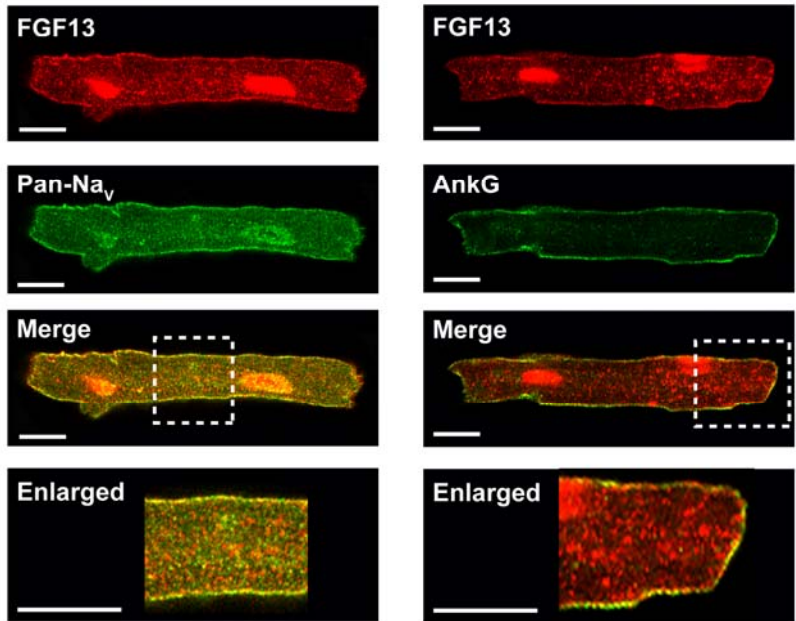

1  
2  
3  
4  
5  
6  
7  
8  
9

**Online Figure III.** Lack of transmural gradient of FGF13 across the left ventricle. Confocal images of immunocytochemistry of FGF13 and Na<sub>v</sub>1.5 (left panels) or FGF13 and ankyrin-G (AnkG) (right panels) in adult mouse ventricular myocytes. Enlarged images (bottom panels) represent the boxed regions in the images above. Scale bar, 25 μm.

1

**Online Table I: qPCR primer pairs used for detecting FGF11-14 and SCN5A mRNA level in adult mouse heart and brain**

| <b>FGF isoforms</b> | <b>Forward primer (5' – 3')</b> | <b>Reverse primer (5' – 3')</b> | <b>Product length (bp)</b> |
|---------------------|---------------------------------|---------------------------------|----------------------------|
| FGF11               | CCAAGGTGCGACTGTGCG              | CGACGCTGACGGTAGAGAG             | 354                        |
| FGF12-A             | CCGCAAGAGGCCAGTGAG              | CACCACACGCAGTCCTACAG            | 177                        |
| FGF12-B             | GGAGAGCAAAGAACCCAG              | CACCACACGCAGTCCTACAG            | 159                        |
| FGF13-core          | CAGCCGACAAGGCTACCAC             | GTTCCGAGGTGTACAAGTATCC          | 184                        |
| FGF13-S             | CGAGAAATCCAATGCCTGC             | CACCACCCGAAGACCCACAG            | 279                        |
| FGF13-U             | GTTAAGGAAGTCATATTCAGAGC         | CACCACCCGAAGACCCACAG            | 155                        |
| FGF13-V             | GCTTCTAAGGAGCCTCAGC             | CACCACCCGAAGACCCACAG            | 158                        |
| FGF13-VY            | GCTTCTAAGGTTCTGGATGAC           | CACCACCCGAAGACCCACAG            | 326                        |
| FGF13-VY/Y          | CACAGAACCCGAAGAGCCTCAG          | CACCACCCGAAGACCCACAG            | 162                        |
| FGF14-A             | GAGCAGCCCCAGCAAGAAC             | GTGGAATTGGTGCTGTCATC            | 215                        |
| FGF14-B             | CCCAAATCAATGTGGTTTC             | GTGGAATTGGTGCTGTCATC            | 211                        |
| SCN5A               | CAACAGCTGGAACATCTTCG            | CCGAAGATGGAGTAGATGAAC           | 398                        |
| GAPDH               | TGTCAGCAATGCATCCTGCA            | CCGTTAGCTCTGGGATGAC             | 220                        |

2  
3  
4
